# Supplementary material
Source: MDPI journal article supplement (https://www.mdpi.com/2073-445X/11/4/581)
Supplement: s1 [file s1]

# How does maize-cowpea intercropping maximize land use and economic return? - A field trial in Bangladesh

Ayesa Akter Suhi <sup>1</sup>, Shamim Mia <sup>1,\*</sup>, Salma Khanam <sup>1</sup>, Mehedi Hasan Mithu <sup>1</sup>, Md. Kamal Uddin <sup>2</sup>, Md. Abdul Muktedir <sup>3</sup>, Sultan Ahmed <sup>1</sup>, Keiji Jindo<sup>4,\*</sup>

<sup>1</sup> Patuakhali Science and Technology University, Barishal, Bangladesh-8602

<sup>2</sup> Department of Land Management, Faculty of Agriculture, Universiti Putra Malaysia, 43400 Serdang, Selangor, Malaysia

<sup>3</sup> Pulses Research Centre, Bangladesh Agricultural Research Institute, Gazipur, Bangladesh.

<sup>4</sup> Agrosystems Research, Wageningen University & Research, P.O. Box 16, 6700 AA, Wageningen, the Netherlands

\* Correspondence: keiji.jindo@wur.nl; Tel.: +31 317 487 231; smia\_agr@pstu.ac.bd

## Supporting information

Number of pages - 11

Number of figures -6

Number of tables – 12

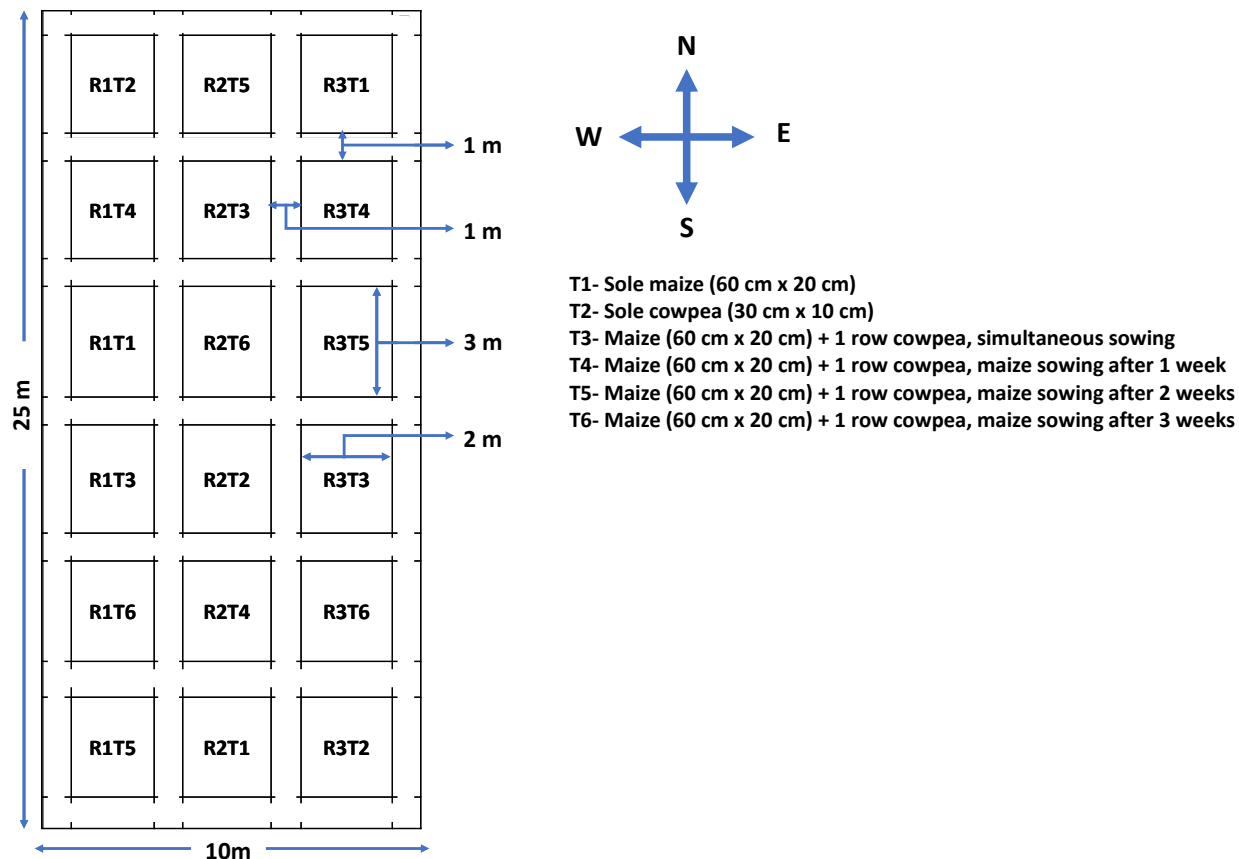

Figure S1: Schematic diagram of experimental design

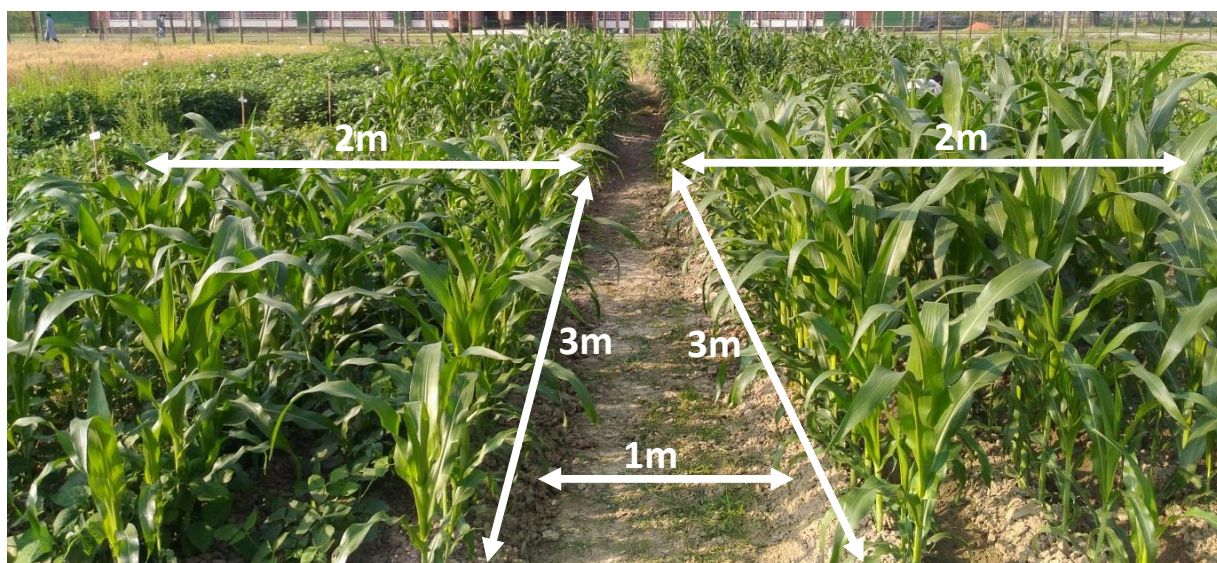

Figure S2: A photograph of field trial

**Table S1: Monthly average air temperature, humidity and total rainfall, cloud and sunshine of the experimental site during the period from December, 2018 to May, 2019**

| Month    | Temperature (°C) |     |      | Rainfall (mm) | Humidity (%) | Cloud (%) | Sunshine (hrs.) |
|----------|------------------|-----|------|---------------|--------------|-----------|-----------------|
|          | Max              | Min | Mean |               |              |           |                 |
| December | 28               | 19  | 24   | 2.1           | 54           | 11        | 353             |
| January  | 30               | 20  | 25   | 0             | 44           | 2         | 372             |
| February | 31               | 22  | 27   | 18.7          | 54           | 9         | 332             |
| March    | 33               | 24  | 29   | 15.1          | 59           | 11        | 372             |
| April    | 35               | 27  | 32   | 8.6           | 66           | 21        | 356             |
| May      | 36               | 29  | 33   | 23.5          | 71           | 31        | 358             |

**Table S2: Sowing dates and duration between maize and cowpea**

| Treatment      | Date of sowing |            | Duration between maize and cowpea (Days) |
|----------------|----------------|------------|------------------------------------------|
|                | Cowpea         | Maize      |                                          |
| T <sub>1</sub> | -              | 18-12-2018 | -                                        |
| T <sub>2</sub> | 18-12-2018     | -          | -                                        |
| T <sub>3</sub> | 18-12-2018     | 18-12-2018 | 0                                        |
| T <sub>4</sub> | 18-12-2018     | 25-12-2018 | 7                                        |
| T <sub>5</sub> | 18-12-2018     | 01-01-2019 | 14                                       |
| T <sub>6</sub> | 18-12-2018     | 08-01-2019 | 21                                       |

#### **Description of the cowpea variety**

Cowpea (*Vigna unguiculata* L. Walp.) is legume grown particularly in dry areas. In Bangladesh has been introduced possibly in 1991 while it is known yet whether it has been grown as wild land race. The cultivar used in this experiment has been collected from the farmers and therefore, the variety is not known to the community. However, the general characteristics of the variety has been listed in the table below-

**Table S3: General morphological indicators and the growth habit of cowpea**

| Days after sowing | Morphological indicator |
|-------------------|-------------------------|
| 10-15             | Seedling emergence      |
| 24-28             | Three-leaf stage        |
| 33-35             | Strat to branching      |
| 38-43             | Three-branch stage      |
| 48-53             | Start of flowering      |
| 60-65             | 50% flowering           |
| 75-80             | Pod formation           |
| 95-115            | Pod Maturity            |

**Table S4: Age of cowpea and maize in measurement of LAI, light interception, Canopy coverage and architecture**

| Treatment      | LAI and light interception measurement |                    | Canopy coverage and architecture measurement |                    |
|----------------|----------------------------------------|--------------------|----------------------------------------------|--------------------|
|                | Age of cowpea (DAS)                    | Age of maize (DAS) | Age of cowpea (DAS)                          | Age of maize (DAS) |
| T <sub>1</sub> | -                                      | 75                 | -                                            | 85                 |
| T <sub>2</sub> | 75                                     | -                  | 85                                           | -                  |
| T <sub>3</sub> | 75                                     | 75                 | 85                                           | 85                 |
| T <sub>4</sub> | 75                                     | 68                 | 85                                           | 78                 |
| T <sub>5</sub> | 75                                     | 61                 | 85                                           | 71                 |
| T <sub>6</sub> | 75                                     | 54                 | 85                                           | 64                 |

**Table S5: ANOVA of yield and yield contributing characters of maize**

| Variable                 | Source    | Nparm | DF | DFDen | F Ratio | Prob > F |
|--------------------------|-----------|-------|----|-------|---------|----------|
| Plant height             | Treatment | 4     | 4  | 8     | 0.6927  | 0.6175   |
| Cob plants <sup>-1</sup> | Treatment | 4     | 4  | 8     | 0.6667  | 0.6328   |
| Cob length               | Treatment | 4     | 4  | 8     | 36.179  | <0.01    |
| Cob circumference        | Treatment | 4     | 4  | 8     | 12.648  | 0.0015   |
| Grain cob <sup>-1</sup>  | Treatment | 4     | 4  | 8     | 5.9349  | 0.0161   |
| 1000 Grain Wt.           | Treatment | 4     | 4  | 8     | 4.8661  | 0.0676   |
| Harvest Index            | Treatment | 4     | 4  | 8     | 1.2691  | 0.3576   |
| Stover yield             | Treatment | 4     | 4  | 8     | 42.904  | <0.01    |
| SPAD value               | Treatment | 4     | 4  | 8     | 133.05  | <0.01    |
| Seed yield               | Treatment | 4     | 4  | 8     | 5.5101  | 0.0198   |
| Biological yield         | Treatment | 4     | 4  | 8     | 14.2922 | 0.01     |
| GDD                      | Treatment | 4     | 4  | 8     | 68.7985 | <0.01    |
| Days to flowering        | Treatment | 4     | 4  | 8     | 8.2097  | 0.0062   |

**Table S6: ANOVA of yield and yield contributing characters of cowpea**

| Variable                          | Source    | Nparm | DF | DFDen | F Ratio | Prob > F |
|-----------------------------------|-----------|-------|----|-------|---------|----------|
| Plant height                      | Treatment | 4     | 4  | 8     | 0.7912  | 0.5625   |
| No. of branch Plant <sup>-1</sup> | Treatment | 4     | 4  | 8     | 1.4308  | 0.3081   |
| Pod plant <sup>-1</sup>           | Treatment | 4     | 4  | 8     | 96.8957 | <0.01    |
| Seed pod <sup>-1</sup>            | Treatment | 4     | 4  | 8     | 3.4223  | 0.0652   |
| Pod Length                        | Treatment | 4     | 4  | 8     | 1.0902  | 0.4231   |
| Seeds/Plant                       | Treatment | 4     | 4  | 8     | 47.7106 | <0.01    |
| SPAD meter value                  | Treatment | 4     | 4  | 8     | 7.1489  | 0.0094   |
| Nodules plant <sup>-1</sup>       | Treatment | 4     | 4  | 8     | 8.1701  | 0.0063   |

|                                 |           |   |   |   |          |       |
|---------------------------------|-----------|---|---|---|----------|-------|
| Yield                           | Treatment | 4 | 4 | 8 | 53.8776  | <0.01 |
| Pod wt./1m <sup>2</sup> area(g) | Treatment | 4 | 4 | 8 | 69.1755  | <0.01 |
| 1000 Grain wt. (gm)             | Treatment | 4 | 4 | 8 | 90.3472  | <0.01 |
| Stover yield                    | Treatment | 4 | 4 | 8 | 123.81   | <0.01 |
| Biological yield                | Treatment | 4 | 4 | 8 | 172.2723 | <0.01 |
| Harvest index                   | Treatment | 4 | 4 | 8 | 5.385    | 0.02  |

**Table S7: ANOVA of Intercropping effects on the above-ground competition**

| Variable                        | Source    | Nparm | DF | DFDen | F Ratio | Prob > F |
|---------------------------------|-----------|-------|----|-------|---------|----------|
| 2g-r-b                          | Treatment | 5     | 5  | 10    | 0.6643  | 0.6591   |
| VARI                            | Treatment | 5     | 5  | 10    | 1.455   | 0.2865   |
| Below canopy PAR (Line to line) | Treatment | 5     | 5  | 10    | 4.6613  | 0.0186   |
| Below canopy PAR (Row to row)   | Treatment | 5     | 5  | 10    | 6.7678  | 0.0053   |
| LAI (Line to line)              | Treatment | 5     | 5  | 10    | 4.6613  | 0.0186   |
| LAI (Row to row)                | Treatment | 5     | 5  | 10    | 6.7678  | 0.0053   |

**Table S8: ANOVA of intercropping systems on the economic analysis**

| Variable                 | Source    | Nparm | DF | DFDen | F Ratio  | Prob > F |
|--------------------------|-----------|-------|----|-------|----------|----------|
| Relative yield maize     | Treatment | 5     | 5  | 10    | 77.1271  | <0.01    |
| Relative yield of cowpea | Treatment | 5     | 5  | 10    | 167.2843 | <0.01    |
| LER                      | Treatment | 5     | 5  | 10    | 35.2627  | <0.01    |
| Maize equivalent yield   | Treatment | 5     | 5  | 10    | 65.0788  | <0.01    |
| Maize gross return       | Treatment | 5     | 5  | 10    | 80.5804  | <0.01    |
| Cowpea gross return      | Treatment | 5     | 5  | 10    | 150.0085 | <0.01    |
| Gross return total       | Treatment | 5     | 5  | 10    | 44.3353  | <0.01    |
| Net Return               | Treatment | 5     | 5  | 10    | 23.0453  | <0.01    |
| BCR                      | Treatment | 5     | 5  | 10    | 14.3465  | 0.0003   |

**Table S9: REML variance component estimates of maize**

| Variable                | Random Effect | Var Ratio | Var Component | Std Error | Wald p-Value | Pct of Total |
|-------------------------|---------------|-----------|---------------|-----------|--------------|--------------|
| Plant height            | Block         | -0.009398 | -0.013333     | 0.305356  | 0.9652       | 0.000        |
|                         | Residual      |           | 1.4186667     | 0.7093333 |              | 100.000      |
|                         | Total         |           | 1.4186667     | 0.7093333 |              | 100.000      |
| Cob plant <sup>-1</sup> | Block         | -0.111111 | -0.000667     | 0.0008028 | 0.4063       | 0.000        |
|                         | Residual      |           | 0.006         | 0.003     |              | 100.000      |
|                         | Total         |           | 0.006         | 0.003     |              | 100.000      |

|                         |          |           |           |           |        |         |
|-------------------------|----------|-----------|-----------|-----------|--------|---------|
| Cob length              | Block    | 0.0376399 | 0.0061667 | 0.04224   | 0.8839 | 3.627   |
|                         | Residual |           | 0.1638333 | 0.0819167 |        | 96.373  |
|                         | Total    |           | 0.17      | 0.0762261 |        | 100.000 |
| Cob circumference       | Block    | 0.0228013 | 0.0023333 | 0.0249912 | 0.9256 | 2.229   |
|                         | Residual |           | 0.1023333 | 0.0511667 |        | 97.771  |
|                         | Total    |           | 0.1046667 | 0.0468549 |        | 100.000 |
| Grain cob <sup>-1</sup> | Block    | -0.195323 | -165.9167 | 85.037705 | 0.0510 | 0.000   |
|                         | Residual |           | 849.44844 | 424.72422 |        | 100.000 |
|                         | Total    |           | 849.44844 | 424.72422 |        | 100.000 |
| 1000 Grain Wt.          | Block    | -0.0388   | -0.299028 | 1.4620078 | 0.8379 | 0.000   |
|                         | Residual |           | 7.7070017 | 3.8535008 |        | 100.000 |
|                         | Total    |           | 7.7070017 | 3.8535008 |        | 100.000 |
| Harvest index           | Block    | -0.048978 | -2.171e-5 | 0.0000803 | 0.7868 | 0.000   |
|                         | Residual |           | 0.0004433 | 0.0002216 |        | 100.000 |
|                         | Total    |           | 0.0004433 | 0.0002216 |        | 100.000 |
| Stover yield            | Block    | 1.3661852 | 0.0270144 | 0.0310322 | 0.3840 | 57.738  |
|                         | Residual |           | 0.0197736 | 0.0098868 |        | 42.262  |
|                         | Total    |           | 0.046788  | 0.0319632 |        | 100.000 |
| SPAD Value              | Block    | 0.9405222 | 0.3241667 | 0.3946081 | 0.4114 | 48.467  |
|                         | Residual |           | 0.3446667 | 0.1723333 |        | 51.533  |
|                         | Total    |           | 0.6688333 | 0.4165751 |        | 100.000 |
| Yield                   | Block    | -0.118672 | -0.031792 | 0.0345307 | 0.3572 | 0.000   |
|                         | Residual |           | 0.2678962 | 0.1339481 |        | 100.000 |
|                         | Total    |           | 0.2678962 | 0.1339481 |        | 100.000 |
| Biological yield        | Block    | -0.051053 | -0.016091 | 0.0565453 | 0.7760 | 0.000   |
|                         | Residual |           | 0.3151877 | 0.1575939 |        | 100.000 |
|                         | Total    |           | 0.3151877 | 0.1575939 |        | 100.000 |
| GDD                     | Block    | 0.174189  | 0.00454   | 0.010095  | 0.6529 | 14.835  |
|                         | Residual |           | 0.026063  | 0.013032  |        | 85.165  |
|                         | Total    |           | 0.030603  | 0.014276  |        | 100     |
| Days to flowering       | Block    | 0.16129   | 0.666667  | 1.54948   | 0.667  | 13.889  |
|                         | Residual |           | 4.133333  | 2.066667  |        | 86.111  |
|                         | Total    |           | 4.8       | 2.227904  |        | 100     |

**Table S10: REML variance component estimates of cowpea**

| Variable     | Random Effect | Var Ratio | Var Component | Std Error | Wald p-Value | Pct of Total |
|--------------|---------------|-----------|---------------|-----------|--------------|--------------|
| Plant height | Block         | 0.1470929 | 202.32467     | 496.84186 | 0.6838       | 12.823       |
|              | Residual      |           | 1375.4887     | 687.74433 |              | 87.177       |
|              | Total         |           | 1577.8133     | 728.45535 |              | 100.000      |

|                                   |          |           |           |           |        |         |
|-----------------------------------|----------|-----------|-----------|-----------|--------|---------|
| No. of branch plant <sup>-1</sup> | Block    | 0.0271508 | 0.0553333 | 0.505808  | 0.9129 | 2.643   |
|                                   | Residual |           | 2.038     | 1.019     |        | 97.357  |
|                                   | Total    |           | 2.0933333 | 0.9374744 |        | 100.000 |
| Pod plant <sup>-1</sup>           | Block    | 2.1780822 | 0.3445    | 0.3764657 | 0.3601 | 68.534  |
|                                   | Residual |           | 0.1581667 | 0.0790833 |        | 31.466  |
|                                   | Total    |           | 0.5026667 | 0.381417  |        | 100.000 |
| Seed pod <sup>-1</sup>            | Block    | -0.084806 | -0.064    | 0.11512   | 0.5783 | 0.000   |
|                                   | Residual |           | 0.7546667 | 0.3773333 |        | 100.000 |
|                                   | Total    |           | 0.7546667 | 0.3773333 |        | 100.000 |
| Pod length                        | Block    | -0.057894 | -0.038987 | 0.1170168 | 0.7390 | 0.000   |
|                                   | Residual |           | 0.67342   | 0.33671   |        | 100.000 |
|                                   | Total    |           | 0.67342   | 0.33671   |        | 100.000 |
| Seeds plant <sup>-1</sup>         | Block    | 1.1559084 | 130.62364 | 153.64083 | 0.3952 | 53.616  |
|                                   | Residual |           | 113.00519 | 56.502593 |        | 46.384  |
|                                   | Total    |           | 243.62883 | 159.75303 |        | 100.000 |
| Nodules plant <sup>-1</sup>       | Block    | -0.153527 | -0.086333 | 0.0620092 | 0.1638 | 0.000   |
|                                   | Residual |           | 0.5623333 | 0.2811667 |        | 100.000 |
|                                   | Total    |           | 0.5623333 | 0.2811667 |        | 100.000 |
| Yield                             | Block    | 0.9207635 | 0.008936  | 0.0109202 | 0.4132 | 47.937  |
|                                   | Residual |           | 0.009705  | 0.0048525 |        | 52.063  |
|                                   | Total    |           | 0.018641  | 0.011549  |        | 100.000 |
| SPAD meter value                  | Block    | -0.17074  | -0.811292 | 0.4950855 | 0.1013 | 0.000   |
|                                   | Residual |           | 4.751625  | 2.3758125 |        | 100.000 |
|                                   | Total    |           | 4.751625  | 2.3758125 |        | 100.000 |
| Pod wt./1m <sup>2</sup> plot(g)   | Block    | -0.132582 | -4.116667 | 3.7447389 | 0.2716 | 0.000   |
|                                   | Residual |           | 31.05     | 15.525    |        | 100.000 |
|                                   | Total    |           | 31.05     | 15.525    |        | 100.000 |
| 1000 Grain wt. (gm)               | Block    | 0.1089113 | 0.2038    | 0.6075826 | 0.7373 | 9.821   |
|                                   | Residual |           | 1.8712467 | 0.9356233 |        | 90.179  |
|                                   | Total    |           | 2.0750467 | 0.9457226 |        | 100.000 |
| Stover yield                      | Block    | 3.5531915 | 0.00167   | 0.0017646 | 0.3440 | 78.037  |
|                                   | Residual |           | 0.00047   | 0.000235  |        | 21.963  |
|                                   | Total    |           | 0.00214   | 0.001774  |        | 100.000 |
| Biological yield                  | Block    | 0.3992435 | 0.0047749 | 0.007266  | 0.5111 | 28.533  |
|                                   | Residual |           | 0.01196   | 0.00598   |        | 71.467  |
|                                   | Total    |           | 0.0167349 | 0.0086169 |        | 100.000 |
| Harvest index                     | Block    | 0.1874539 | 0.0001508 | 0.0003219 | 0.6395 | 15.786  |
|                                   | Residual |           | 0.0008043 | 0.0004022 |        | 84.214  |
|                                   | Total    |           | 0.0009551 | 0.0004479 |        | 100.000 |

**Table S11: REML variance component estimates of intercropping analysis**

| Variable                 | Random Effect | Var Ratio | Var Component | Std Error | Wald p-Value | Pct of Total |
|--------------------------|---------------|-----------|---------------|-----------|--------------|--------------|
| Relative Yield maize     | Block         | 0.1536037 | 0.000784      | 0.0016785 | 0.6404       | 13.315       |
|                          | Residual      |           | 0.0051043     | 0.0022827 |              | 86.685       |
|                          | Total         |           | 0.0058884     | 0.0025082 |              | 100.000      |
| Relative yield of cowpea | Block         | -0.086996 | -0.000207     | 0.0002597 | 0.4252       | 0.000        |
|                          | Residual      |           | 0.0023799     | 0.0010643 |              | 100.000      |
|                          | Total         |           | 0.0023799     | 0.0010643 |              | 100.000      |
| LER                      | Block         | 0.2720841 | 0.0018216     | 0.0029795 | 0.5410       | 21.389       |
|                          | Residual      |           | 0.006695      | 0.0029941 |              | 78.611       |
|                          | Total         |           | 0.0085166     | 0.0038541 |              | 100.000      |
| Maize equivalent yield   | Block         | -0.106932 | -0.022723     | 0.0202978 | 0.2629       | 0.000        |
|                          | Residual      |           | 0.2125018     | 0.0950337 |              | 100.000      |
|                          | Total         |           | 0.2125018     | 0.0950337 |              | 100.000      |
| Maize Gross Return       | Block         | -0.097246 | -4768785      | 4994882.1 | 0.3397       | 0.000        |
|                          | Residual      |           | 49038345      | 21930615  |              | 100.000      |
|                          | Total         |           | 49038345      | 21930615  |              | 100.000      |
| Cowpea Gross Return      | Block         | 0.6220573 | 3723328.5     | 4741946.4 | 0.4323       | 38.350       |
|                          | Residual      |           | 5985507.6     | 2676800.4 |              | 61.650       |
|                          | Total         |           | 9708836.1     | 5221388.3 |              | 100.000      |
| Gross Return Total       | Block         | -0.067549 | -3341297      | 6134460.6 | 0.5860       | 0.000        |
|                          | Residual      |           | 49465099      | 22121465  |              | 100.000      |
|                          | Total         |           | 49465099      | 22121465  |              | 100.000      |
| Net Return               | Block         | -0.067549 | -3341297      | 6134460.6 | 0.5860       | 0.000        |
|                          | Residual      |           | 49465099      | 22121465  |              | 100.000      |
|                          | Total         |           | 49465099      | 22121465  |              | 100.000      |
| BCR                      | Block         | -0.037647 | -0.000765     | 0.0030289 | 0.8005       | 0.000        |
|                          | Residual      |           | 0.0203276     | 0.0090908 |              | 100.000      |
|                          | Total         |           | 0.0203276     | 0.0090908 |              | 100.000      |

**Table S12: REML variance component estimates of above-ground competition**

| Variable | Random Effect | Var Ratio | Var Component | Std Error | Wald p-Value | Pct of Total |
|----------|---------------|-----------|---------------|-----------|--------------|--------------|
| 2g-r-b   | Block         | 0.0266432 | 4.9422e-5     | 0.0003843 | 0.8977       | 2.595        |

|                                    |          |           |           |           |        |         |
|------------------------------------|----------|-----------|-----------|-----------|--------|---------|
|                                    | Residual |           | 0.001855  | 0.0008296 |        | 97.405  |
|                                    | Total    |           | 0.0019044 | 0.0007788 |        | 100.000 |
| VARI                               | Block    | 0.9124135 | 0.0027735 | 0.003288  | 0.3989 | 47.710  |
|                                    | Residual |           | 0.0030398 | 0.0013594 |        | 52.290  |
|                                    | Total    |           | 0.0058133 | 0.0034703 |        | 100.000 |
| Below canopy<br>PAR (Line to line) | Block    | -0.104204 | -194.1493 | 181.18956 | 0.2839 | 0.000   |
|                                    | Residual |           | 1863.1701 | 833.23502 |        | 100.000 |
|                                    | Total    |           | 1863.1701 | 833.23502 |        | 100.000 |
| Below canopy<br>PAR (Row to row)   | Block    | -0.052078 | -108.7    | 285.32202 | 0.7032 | 0.000   |
|                                    | Residual |           | 2087.2556 | 933.44906 |        | 100.000 |
|                                    | Total    |           | 2087.2556 | 933.44906 |        | 100.000 |
| LAI (Line to line)                 | Block    | -0.104204 | -0.006758 | 0.0063072 | 0.2839 | 0.000   |
|                                    | Residual |           | 0.064857  | 0.0290049 |        | 100.000 |
|                                    | Total    |           | 0.064857  | 0.0290049 |        | 100.000 |
| LAI (Row to row)                   | Block    | -0.052078 | -0.002104 | 0.0055238 | 0.7032 | 0.000   |
|                                    | Residual |           | 0.0404093 | 0.0180716 |        | 100.000 |
|                                    | Total    |           | 0.0404093 | 0.0180716 |        | 100.000 |

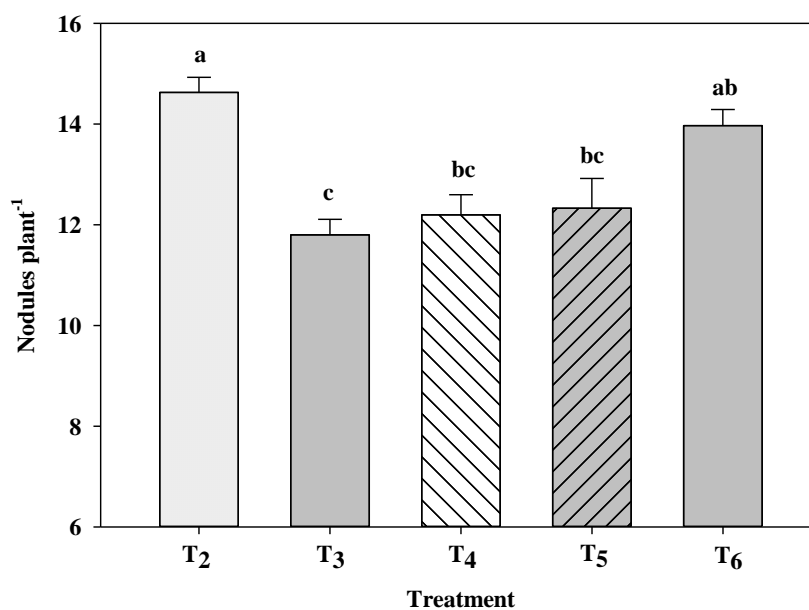

**Figure S3:** Nodules plant<sup>-1</sup> of cowpea grown under different intercropping practices. The treatments are: T<sub>2</sub>—sole cowpea, T<sub>3</sub>—maize + cowpea intercropping, simultaneous sowing, T<sub>4</sub>—maize + cowpea intercropping, maize sown after 1 wk, T<sub>5</sub>—maize + cowpea intercropping, maize sown after 2 wk, and T<sub>6</sub>—maize + cowpea intercropping, maize sown after 3 wk. Different letters above the bars indicate statistically significant differences at Tukey's HSD ( $\alpha=5\%$ ). Error bars represent the standard error of means, N=3.

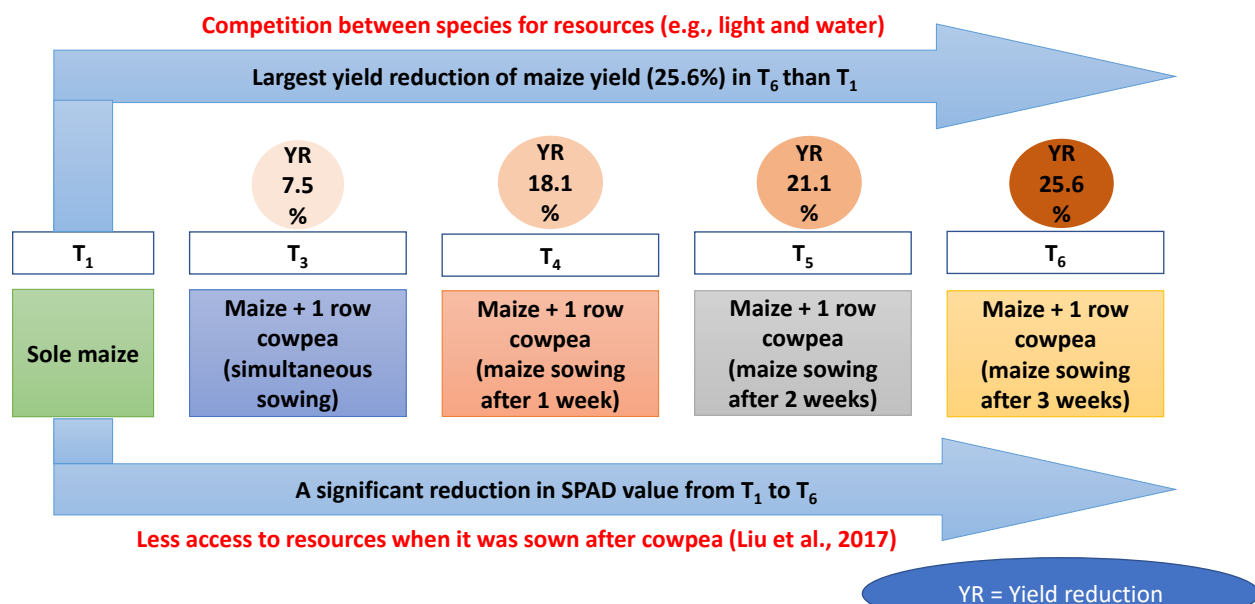

Figure S4. Changes in the performance maize due to its cultivation under difference practices.

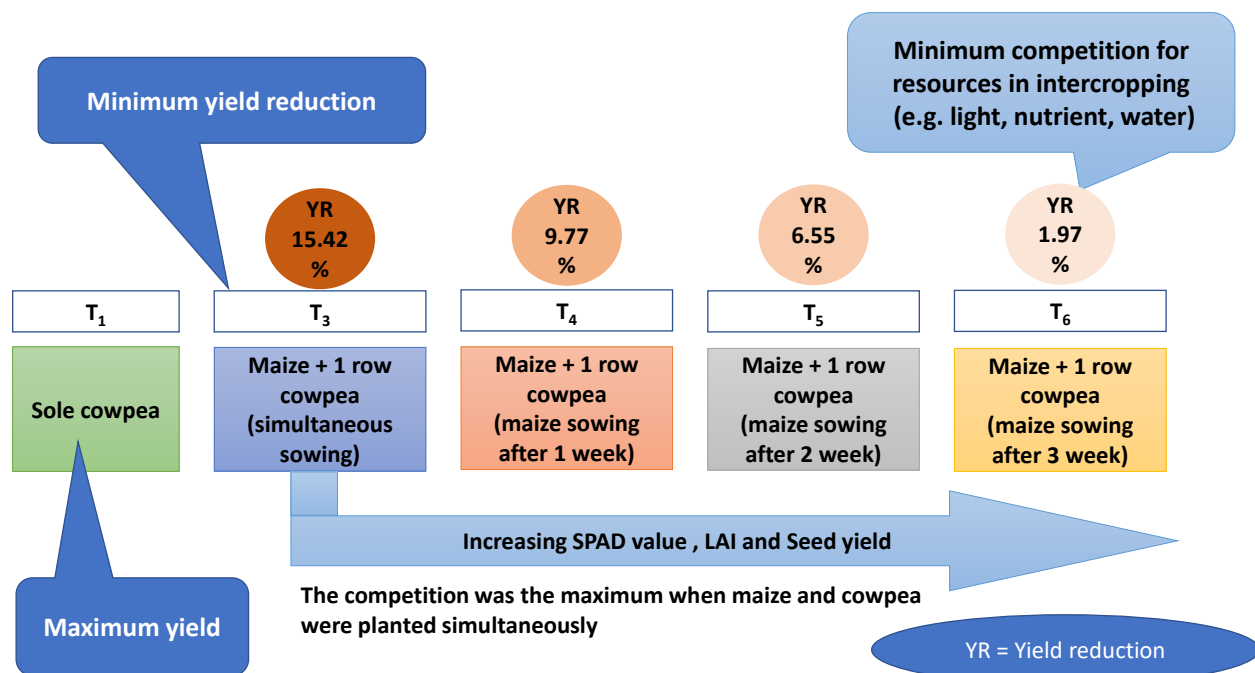

Figure S5. Changes in cowpea yield as influenced by different cultivation practices

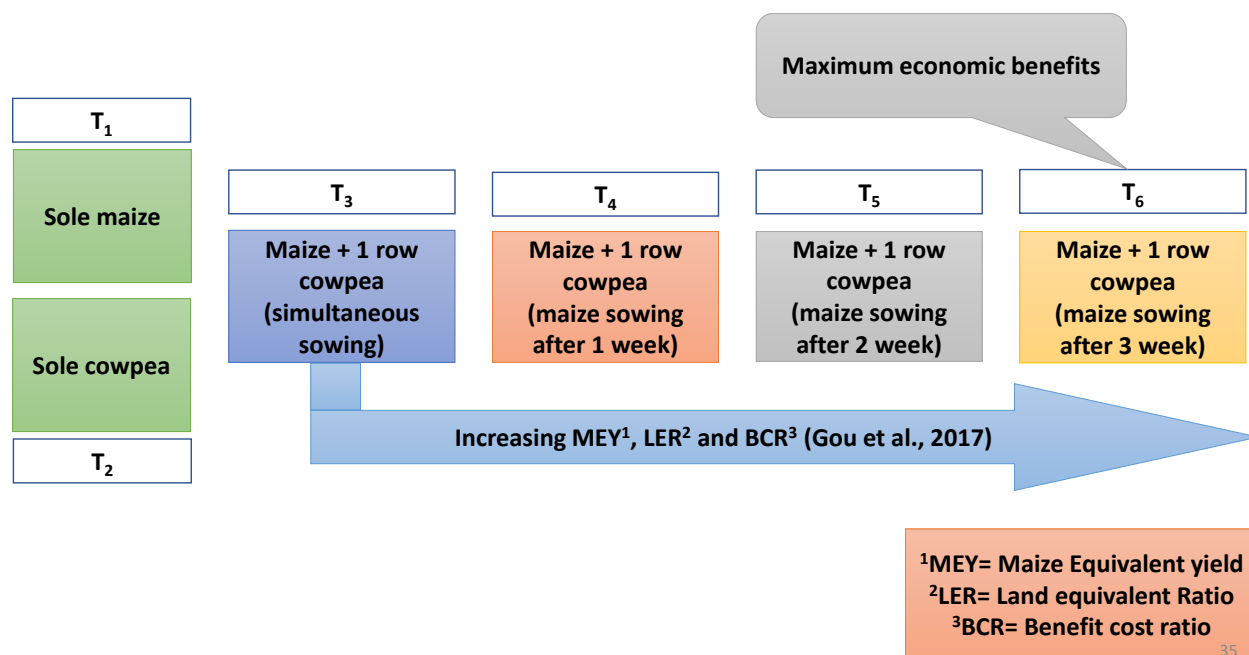

Figure S6. Yield advantage and economic benefits of intercropping
